# Supplementary material
Source: publisher figshare collection journal article supplement (https://acs.figshare.com/ndownloader/files/7270808)
Supplement: Supplementary file 1 [file 7270808]

# Tribotronic Tuning Diode for Active Analog Signals

## Modulation

Tao Zhou,<sup>†,‡</sup> Zhi Wei Yang,<sup>†,‡</sup> Yaokun Pang,<sup>†</sup> Liang Xu,<sup>†</sup> Chi Zhang,<sup>†\*</sup> Zhong Lin Wang<sup>†,§\*</sup>

<sup>†</sup>Beijing Institute of Nanoenergy and Nanosystems, Chinese Academy of Sciences; National Center for Nanoscience and Technology (NCNST), Beijing 100083, P. R. China

<sup>§</sup>School of Materials Science and Engineering, Georgia Institute of Technology, Atlanta, GA 30332-0245, USA

Corresponding Author

\*E-mail: [czhang@binn.cas.cn](mailto:czhang@binn.cas.cn); [zlwang@gatech.edu](mailto:zlwang@gatech.edu).

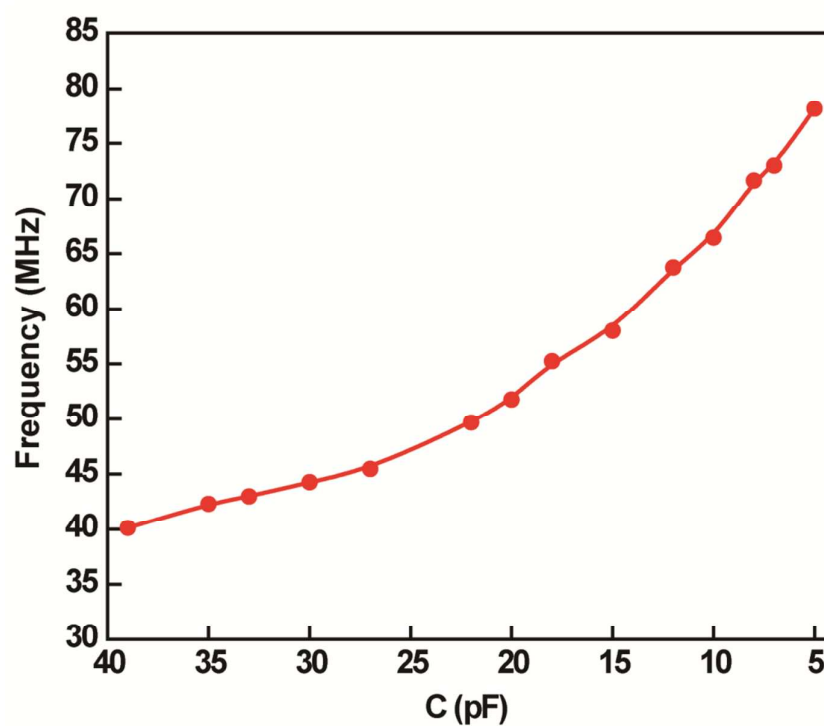

Figure S1. The dependence of signal frequency modulation on a series of different capacitors.

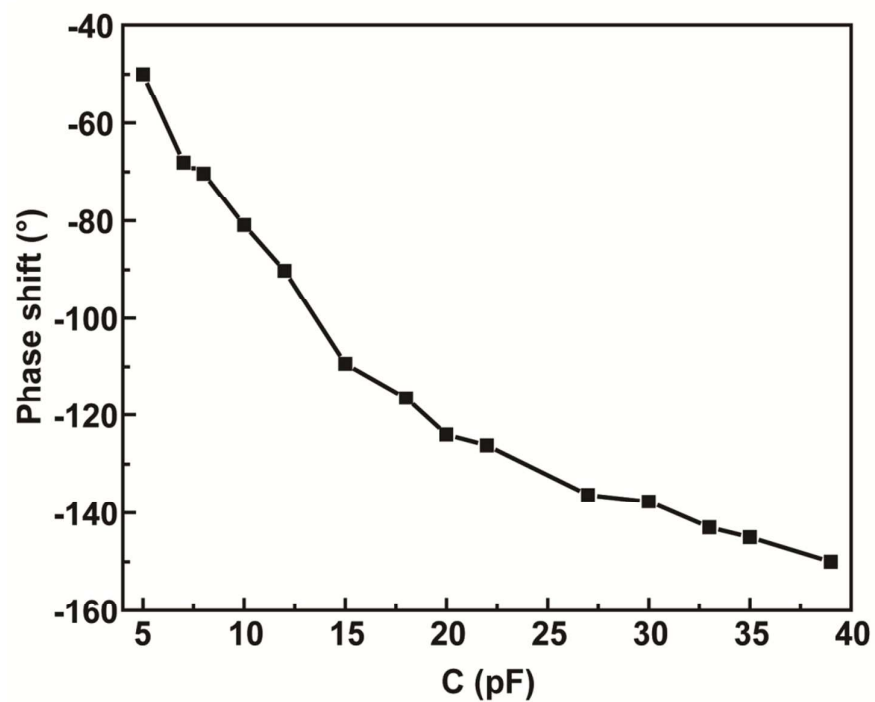

Figure S2. The dependence of phase shift on a series of different capacitors.

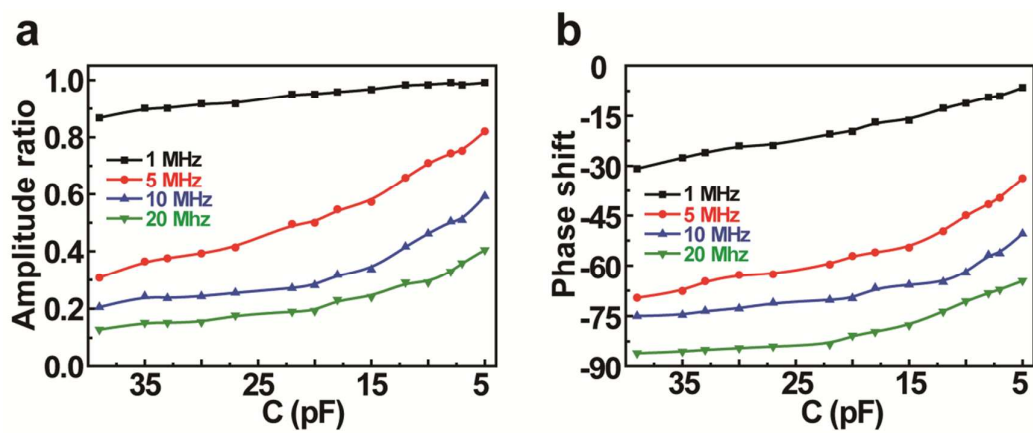

Figure S3. The dependence of amplitude ratio (a) and phase shift (b) on a series of different capacitors at different signal frequencies.
